# Supplementary material for: Triggered isothermal PCR by denaturation bubble-mediated strand exchange amplification
Source: Royal Society of Chemistry journal article supplement (doi:10.1039/c6cc05906f), 2016-01-01
Supplement: c6cc05906f1.pdf [file c6cc05906f1.pdf]

# **Supporting Information**

## **Triggered Isothermal PCR by Denaturation**

### **Bubble-mediated Strand Exchange Amplification**

Chao Shi<sup>a</sup>, Fanjin Shang<sup>b</sup>, Meiling Zhou<sup>b</sup>, Pansong Zhang<sup>c</sup>, Yifan Wang<sup>b</sup> and Cuiping Ma<sup>\*,b</sup>

<sup>a</sup>College of Life Sciences, Qingdao University, Qingdao, 266071, P. R. China.

<sup>b</sup>Key Laboratory of Sensor Analysis of Tumor Marker, Ministry of Education, College of Chemistry and Molecular Engineering, Qingdao University of Science and Technology, Qingdao 266042, P. R. China.

<sup>c</sup>College of Chemical Engineering, Qingdao University of Science and Technology, Qingdao 266042, P. R. China.

**\*Corresponding author.**

Dr. Cuiping Ma; Tel. (Fax.): +86-84022680. E-mail: [mcp169@163.com](mailto:mcp169@163.com)

## Materials and methods:

### Materials

All primers (**Supplementary Table S1**) were designed by using NUPACK software (<http://www.nupack.org/>), synthesized by Sangon Biotech (Shanghai, China) and purified by HPLC. The *Bst* 2.0 WarmStart™ DNA polymerase (8 U/μL) were purchased from New England Biolabs. Eva Green was purchased from Bridgen (Beijing, China). RNA pure reagent kit for rapid extraction of ultrapure RNA was ordered from Biomed (Beijing, China). 20-bp DNA ladder and the chemicals used to prepare electrophoresis were purchased from Dalian Takara Company (China). RPMI 1640 cell medium including 10% fetal bovine serum (FBS) was purchased from Sangon Biotech (Shanghai, China). PCloneEZ vector was obtained from CloneSmarter (USA). All chemicals were of analytical grade unless otherwise indicated.

### Methods

#### The reaction system

The optimized SEA reaction was carried out in 10 μL containing  $1.0 \times 10^{-6}$  M P1 and P2,  $5.0 \times 10^{-4}$  M dNTPs, 10% PEG-200, 0.5×Eva Green, 0.8 U *Bst* 2.0 WarmStart™ DNA polymerase, 1×ThermoPol buffer (20 mM Tris-HCl, 10 mM KCl, 10 mM (NH<sub>4</sub>)<sub>2</sub>SO<sub>4</sub>, 2 mM MgSO<sub>4</sub>, 0.1% Triton X-100, pH8.8 @ 25°C). The reaction was initiated by adding the different targets without pre-treatment and incubated at 65 °C. No template control (NTC) was used as a negative control. The SEA reaction was performed in a CFX96™ Real-Time PCR detection system (Bio-Rad) at 1-min

intervals. 17.5% native PAGE was carried out using tris-acetate-EDTA (TAE) buffer (pH 8.0) for 55 min at 135 V.

## **RNA Extraction**

According to the method described in the literature<sup>29</sup>, the total RNA was extracted from *E. coli* by using RNA pure reagent kit for rapid extraction of ultrapure RNA. RNA was verified using agarose gel electrophoresis without denaturing conditions by ethidium bromide staining (data not shown).

## **Isolation of plasmid DNA**

The pBluescript II KS(+) plasmid DNA was extracted according to the method described in the literature<sup>31</sup>.

29. Shi, C.; Shen, X.; Niu S.; Ma, C. *J. Am. Chem. Soc.* **2015**, 137(43): 13804-13806.

31. Green, M. R.; Sambrook, J. *Molecular cloning: a laboratory manual*; Cold Spring Harbor Laboratory Press New York, **2012**.

## Supplementary Figures

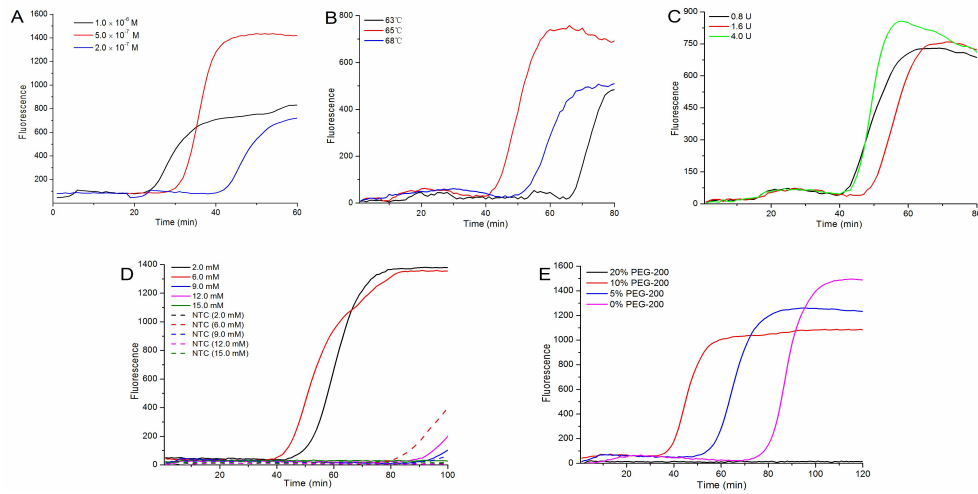

**Figure S1. Optimization of SEA reaction.**

A. Optimization of the concentration of primer. The reaction mixture contained  $1.0 \times 10^{-9}$  M HCV DNA,  $2.0 \times 10^{-7}$  M,  $5.0 \times 10^{-7}$  M and  $1.0 \times 10^{-6}$  M of each primer, 0.8 U *Bst* 2.0 WarmStart™ DNA polymerase,  $5.0 \times 10^{-4}$  M dNTPs, 0.5×Eva Green and 1×ThermoPol buffer and was incubated at  $65^\circ\text{C}$ . The fluorescence signal was rapidly increased when the concentration of each primer was  $1.0 \times 10^{-6}$  M. Therefore,  $1.0 \times 10^{-6}$  M of each primer was adopted for SEA reaction.

B. Optimization of reaction temperature. The SEA was initiated by  $1.0 \times 10^{-9}$  M *E. coli* 16S rRNA, and other assay conditions were the same as above described. The real-time fluorescence curves were measured at  $63^\circ\text{C}$ ,  $65^\circ\text{C}$  and  $68^\circ\text{C}$ , respectively. For the same target concentration, the fluorescence intensity was increased higher at  $65^\circ\text{C}$  than that of  $63^\circ\text{C}$  and  $68^\circ\text{C}$ . Thus,  $65^\circ\text{C}$  was selected as the optimum reaction temperature for SEA reaction.

C. Effect of the amount of DNA polymerase. With  $1.0 \times 10^{-9}$  M of *E. coli* 16S rRNA target, the fluorescence signals were respectively measured by adding 0.8 U, 1.6 U and 4.0 U *Bst* 2.0 WarmStart™ DNA polymerase. Other experiment conditions were optimum. The fluorescence signals for 0.8 U and 4.0 U *Bst* DNA polymerase were earlier than that of 1.6 U *Bst* DNA polymerase. Considering of effect and cost, 0.8 U *Bst* 2.0 WarmStart™ DNA polymerase was selected for the SEA assay.

D. Effect of the concentration of  $\text{Mg}^{2+}$ . The above-described optimum assay conditions were used.

The detection target was  $1.0 \times 10^{-9}$  M of *E. coli* 16S rRNA. When both 2.0 and 6.0 mM  $Mg^{2+}$  were added, fluorescence signals were greatly increased. Due to the background fluorescence signal of NTC generated by adding 6.0 mM  $Mg^{2+}$ , 2 mM  $Mg^{2+}$  was chose in SEA reaction.

E. The real-time fluorescence curves for different concentrations of PEG-200. The concentration of the pBlu2KSP target was  $1.0 \times 10^{-9}$  M. When PEG-200 was increased to 10%, Ct value fell roughly 40 cycles for the tested target DNA compared with the negative control, which showed great increase for the amplification efficiency of SEA. Thus, 10% PEG-200 was used for the SEA reaction.

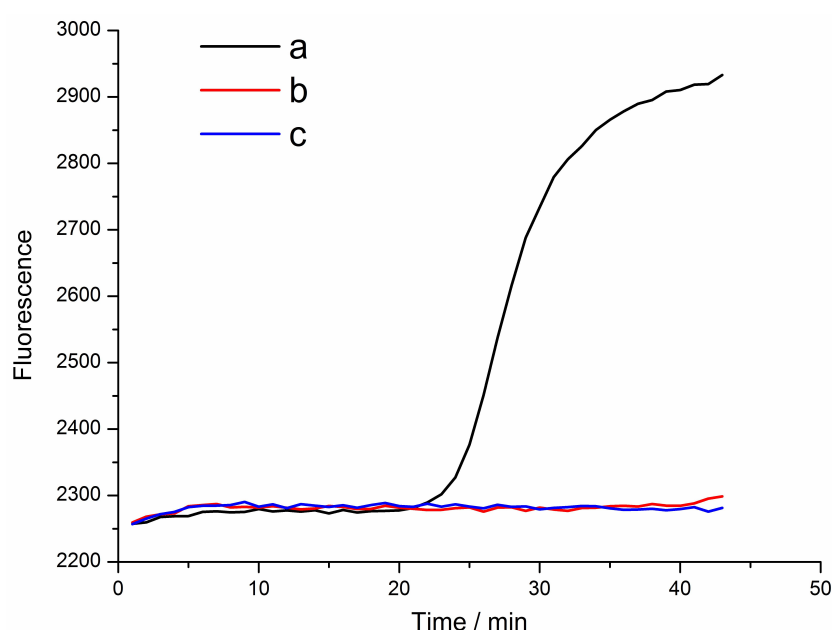

**Figure S2. The specificity of our method.**

a. real-time fluorescence curve from completely complementary P1; b. real-time fluorescence curve from one-base mismatch P1 (T-A); c. real-time fluorescence curve from one-base mismatch P1 (T-C).

## Supplementary Table

**Supplementary Table S1.** Sequences of nucleic acids used in this work.

| Templates/primers |                                                                           | Sequences (5'-3')                                                                                                                                                                                                                                                                                                                                                                                                                                                                                                                                                                                                                   |
|-------------------|---------------------------------------------------------------------------|-------------------------------------------------------------------------------------------------------------------------------------------------------------------------------------------------------------------------------------------------------------------------------------------------------------------------------------------------------------------------------------------------------------------------------------------------------------------------------------------------------------------------------------------------------------------------------------------------------------------------------------|
| <b>Primer P1</b>  | <i>E. coli</i> 16S rDNA<br>( <sup>a</sup> J01859.1 <sup>b</sup> 935-1107) | CAAGCGGTGGAGCATGTGGTTTAATTCGATGCAACGCG<br>AAGAACCTTACCTGGTCTTGACATCCACGGAAGTTTTC<br>AGAGATGAGAATGTGCCTTCGGGAACCGTGAGACAGG<br>TGCTGCATGGCTGTCGTCAGCTCGTGTTGTGAAATGTT<br>GGGTAAAGTCCCGCAACGAGCG (173 nt)                                                                                                                                                                                                                                                                                                                                                                                                                              |
|                   | <i>Taq</i> DNA polymerase                                                 | CGCTCGTTGCGGGACTTAACCC                                                                                                                                                                                                                                                                                                                                                                                                                                                                                                                                                                                                              |
|                   | Vent DNA polymerase                                                       |                                                                                                                                                                                                                                                                                                                                                                                                                                                                                                                                                                                                                                     |
|                   | Vent (exo <sup>-</sup> ) DNA polymerase                                   | CGCTCGTTGCGGGACTTAACC                                                                                                                                                                                                                                                                                                                                                                                                                                                                                                                                                                                                               |
|                   | <i>Bst</i> 2.0 WarmStart DNA polymerase                                   |                                                                                                                                                                                                                                                                                                                                                                                                                                                                                                                                                                                                                                     |
| <b>Primer P2</b>  | <i>Taq</i> DNA polymerase                                                 | GGCTGTCGTCAGCTCGTGTTGTG                                                                                                                                                                                                                                                                                                                                                                                                                                                                                                                                                                                                             |
|                   | Vent DNA polymerase                                                       |                                                                                                                                                                                                                                                                                                                                                                                                                                                                                                                                                                                                                                     |
|                   | Vent (exo <sup>-</sup> ) DNA polymerase                                   | GCTGTCGTCAGCTCGTGTTG                                                                                                                                                                                                                                                                                                                                                                                                                                                                                                                                                                                                                |
|                   | <i>Bst</i> 2.0 WarmStart DNA polymerase                                   |                                                                                                                                                                                                                                                                                                                                                                                                                                                                                                                                                                                                                                     |
|                   | <i>E. coli</i> 16S rDNA ( <sup>a</sup> J01859.1 <sup>b</sup> 250-795)     | GTAGGTGGGGTAACGGCTCACCTAGGCGACGATCCCTA<br>GCTGGTCTGAGAGGATGACCAGCCACACTGGAAGTGA<br>GACACGGTCCAGACTCCTACGGGAGGCAGCAGTGGGG<br>AATATTGCACAATGGGCGCAAGCCTGATGCAGCCATGC<br>CGCGTGTATGAAGAAGGCCTTCGGGTTGTAAAGTACTT<br>TCAGCGGGGAGGAAGGGAGTAAAGTTAATACCTTTGCT<br>CATTGACGTTACCCGCAGAAGAAGCACCGGCTAACTCC<br>GTGCCAGCAGCCGCGGTAATACGGAGGGTGCAAGCGT<br>TAATCGGAATTACTGGGCGTAAAGCGCACGCAGGCGGT<br>TTGTTAAGTCAGATGTGAAATCCCCGGGCTCAACCTGG<br>GAACTGCATCTGATACTGGCAAGCTTGAGTCTCGTAGA<br>GGGGGGTAGAATTCCAGGTGTAGCGGTGAAATGCGTA<br>GAGATCTGGAGGAATACCGGTGGCGAAGGCGGCCCC<br>TGGACGAAGACTGACGCTCAGGTGCGAAAGCGTG GGG<br>AGCAAACAGGATTAGATACC (546 nt) |
|                   | <b>Primer P1-45</b>                                                       | GTGTGGCTGGTCATCCTCTCAGAC                                                                                                                                                                                                                                                                                                                                                                                                                                                                                                                                                                                                            |
|                   | <b>Primer P2-45</b>                                                       | CTAGGCGACGATCCCTAGCTG                                                                                                                                                                                                                                                                                                                                                                                                                                                                                                                                                                                                               |
|                   | <b>Primer P1-66</b>                                                       | GTGTGGCTGGTCATCCTCTCAGAC                                                                                                                                                                                                                                                                                                                                                                                                                                                                                                                                                                                                            |
|                   | <b>Primer P2-66</b>                                                       | GTAGGTGGGGTAACGGCTCAC                                                                                                                                                                                                                                                                                                                                                                                                                                                                                                                                                                                                               |
|                   | <b>Primer P1-87</b>                                                       | ACTGCTGCCTCCCGTA                                                                                                                                                                                                                                                                                                                                                                                                                                                                                                                                                                                                                    |

|                                                                            |                                                                                             |
|----------------------------------------------------------------------------|---------------------------------------------------------------------------------------------|
| <b>Primer P2-87</b>                                                        | CTAGGCGACGATCCCTAGCT                                                                        |
| <b>pBluescript II KS(+) (<sup>a</sup>X52327.1 <sup>b</sup>559-612)</b>     | <u>ATTAAGTTGGGTAACGCCAGGGT</u> TTTCCCAGT <u>CACGAC</u><br>GTTGTAAAACGACGGC ( <b>54 nt</b> ) |
| <b>Primer P1</b>                                                           | GCCGTCGTTTTACAACGTCGTGA                                                                     |
| <b>Primer P2</b>                                                           | ATTAAGTTGGGTAACGCCAGGGT                                                                     |
| <b><i>E.coli</i> 16S rRNA (<sup>a</sup>J01859.1 <sup>b</sup>1057-1107)</b> | <u>GCUGUCGUCAGCUCGUGUUGUGAAAUGUUGGGUUA</u><br>AGUCCCGCAACGAGCG ( <b>51 nt</b> )             |
| <b>Primer P1</b>                                                           | CGCTCGTTGCGGGACTTAACC                                                                       |
| <b>Primer P2</b>                                                           | GCTGTCGTCAGCTCGTGTTG                                                                        |
| <b>Hepatitis C Virus (HCV) (<sup>a</sup>D10749.1 <sup>b</sup>283-332)</b>  | <u>GTGGTACTGCCTGATAGGGTGCTTGCGAGTGCCCGGG</u><br>AGGTCTCGTAGA (50nt)                         |
| <b>Primer P1</b>                                                           | ACCTCCCGGGGCACT                                                                             |
| <b>Primer P2</b>                                                           | GCCTGATAGGGTGCTTGCG                                                                         |
| <b>Primer P1 (T-A)</b>                                                     | ACCTCCCGGGGCACA                                                                             |
| <b>Primer P1 (T-C)</b>                                                     | ACCTCCCGGGGCACC                                                                             |

<sup>a</sup> GenBank accession number    <sup>b</sup> The position of specific sequence in genomic DNA

The dotted line in sequence of target represented the complementary sequence of Primer P1. The underlined portion was the complementary sequence of Primer P2.

**Supplementary Table S2.** The sequencing data of 87-bp amplification products.

| Nucleic acids                              |        | Sequences (5'-3')                                                                                                                                                                                                                                                                                                                                                                                                                                                                                                                                                                                                                                                                                                                                                                                                                     |
|--------------------------------------------|--------|---------------------------------------------------------------------------------------------------------------------------------------------------------------------------------------------------------------------------------------------------------------------------------------------------------------------------------------------------------------------------------------------------------------------------------------------------------------------------------------------------------------------------------------------------------------------------------------------------------------------------------------------------------------------------------------------------------------------------------------------------------------------------------------------------------------------------------------|
| 87-bp tandem repeats with variable numbers | 458 bp | <p>ACTGCTGCCTCCCGTAGGAGTCTGGACCGTGTCTCAGTTCAGTGTGGCTGGTCATCCT</p> <p>CTCAGACCAGCTAGGGATCGTCGCCTAGGTGAGCCGTTACCCACCAACTTCCC<i>ACT</i></p> <p>GCTGCCTCCCGTAGGAGTCTGGACCGTGTCTCAGTTCAGTGTGGCTGGTCATCCTCTC</p> <p>AGACCAGCTAGGGATCGTCGCCTAGGTGAGCCGTTACCCACCAACTTCCC<i>ACTGCT</i></p> <p>GCCTCCCGTAGGAGTCTGGACCGTGTCTCAGTTCAGTGTGGCTGGTCATCCTCTCAGA</p> <p>CCAGCTAGGGATCGTCGCCT<i>7</i>GGTGAGCCGTTACCCACCAAGCTGCATCAGGCTTGCG</p> <p>CCCATTGTGCAATATCCCCACTGCTGCCTCCCGTAGGAGTCTGGACCGTGTCTCAGTT</p> <p>CCAGTGTGGCTGGTCATCCTCTCAGACCAGCTAGGGATCGTCGCCT<i>7</i>G</p>                                                                                                                                                                                                                                                                         |
|                                            | 677 bp | <p>ACTGCTGCCTCCCGTAGGAGTCTGGACCGTGTCTCAGTTCAGTGTGGCTGGTCATCCT</p> <p>CTCAGACCAGCTAGGGATCGTCGCCTAGGTGAGCCGTTACCCACCAACTTCCC<i>ACTG</i></p> <p>CTGCCTCCCGTAGGAGTCTGGACCGTGTCTCAGTTCAGTGTGGCTGGTCATCCTCTCA</p> <p>GACCAGCTAGGGATCGTCGCCT<i>7</i>GGTGAGCCGTTACCCACCAACTTCCC<i>ACTGCTG</i></p> <p>CCTCCCGTAGGAGTCTGGACCGTGTCTCAGTTCAGTGTGGCTGGTCATCCTCTCAGAC</p> <p>CAGCTAGGGATCGTCGCCTAGGTGAGCCGTTACCCACCAACTTCCC<i>ACTGCTGCCTC</i></p> <p>CCGTAGGAGTCTGGACCGTGTCTCAGTTCAGTGTGGCTGGTCATCCTCTCAGACCAG</p> <p>CTAGGGATCGTCGCCTAGGTGAGCCGTTACCCACCAACTTCCC<i>ACTGCTGCCTCCCG</i></p> <p>TAGGAGTCTGGACCGTGTCTCAGTTCAGTGTGGCTGGTCATCCTCTCAGACCAGCTA</p> <p>GGGATCGTCGCCTAGGTGAGCCGTTACCCACCAACTTCCC<i>ACTGCTGCCTCCCGTAG</i></p> <p>GAGTCTGGACCGTGTCTCAGTTCAGTGTGGCTGGTCATCCTCTCAGACCAGCTAGGG</p> <p>ATCGTCGCCT<i>7</i>GAAGGGCGACACGCGAATTCG</p> |

The gray shaded region represented the complementary sequence of 87-bp amplification product. The dotted line represented the insertion of unexpected bases. The mutated bases of amplification products were shown in red and italic.
